# Supplementary material for: Preprocessing choices affect RNA velocity results for droplet scRNA-seq data
Source: PubMed Central journal article supplement (PMC7822509; doi:10.1371/journal.pcbi.1008585), 2021-01-11

### Spermatogenesis, spliced

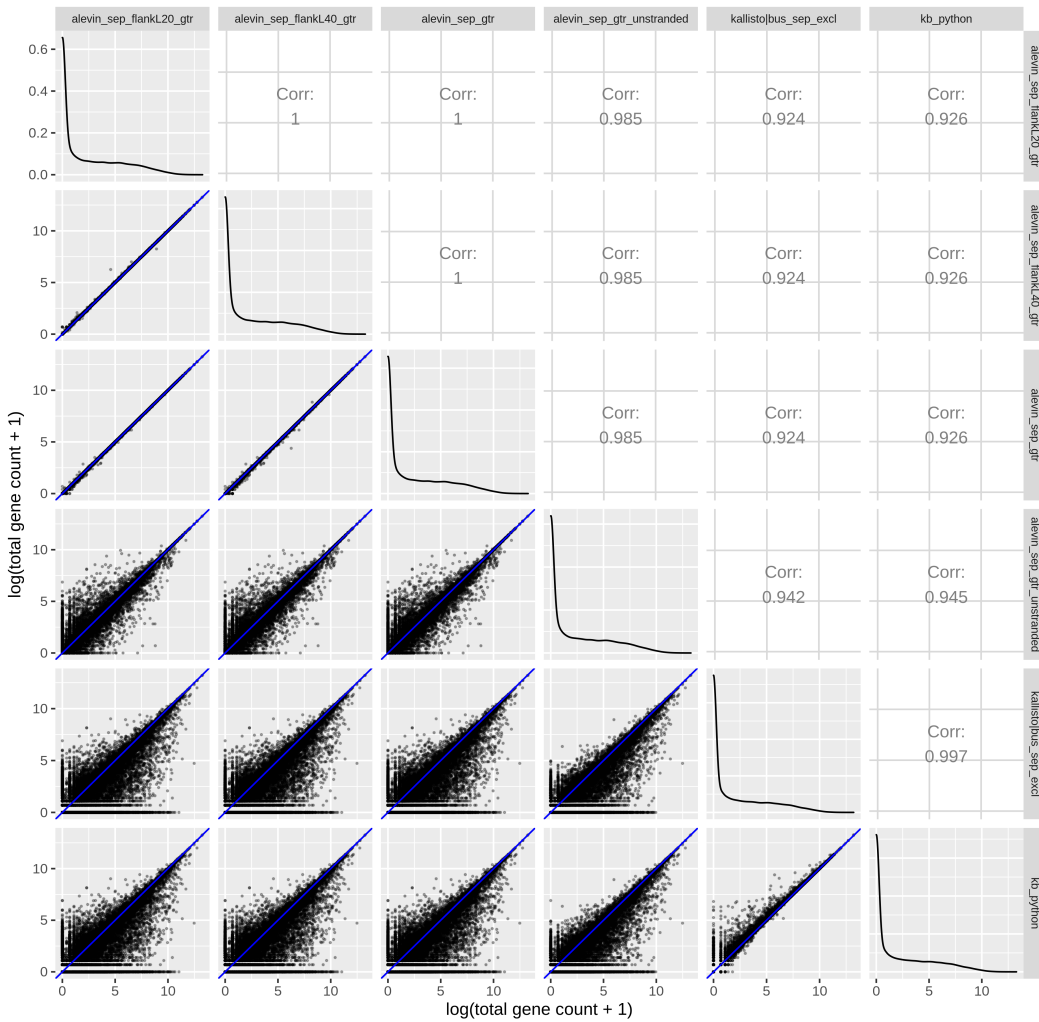

### Spermatogenesis, unspliced

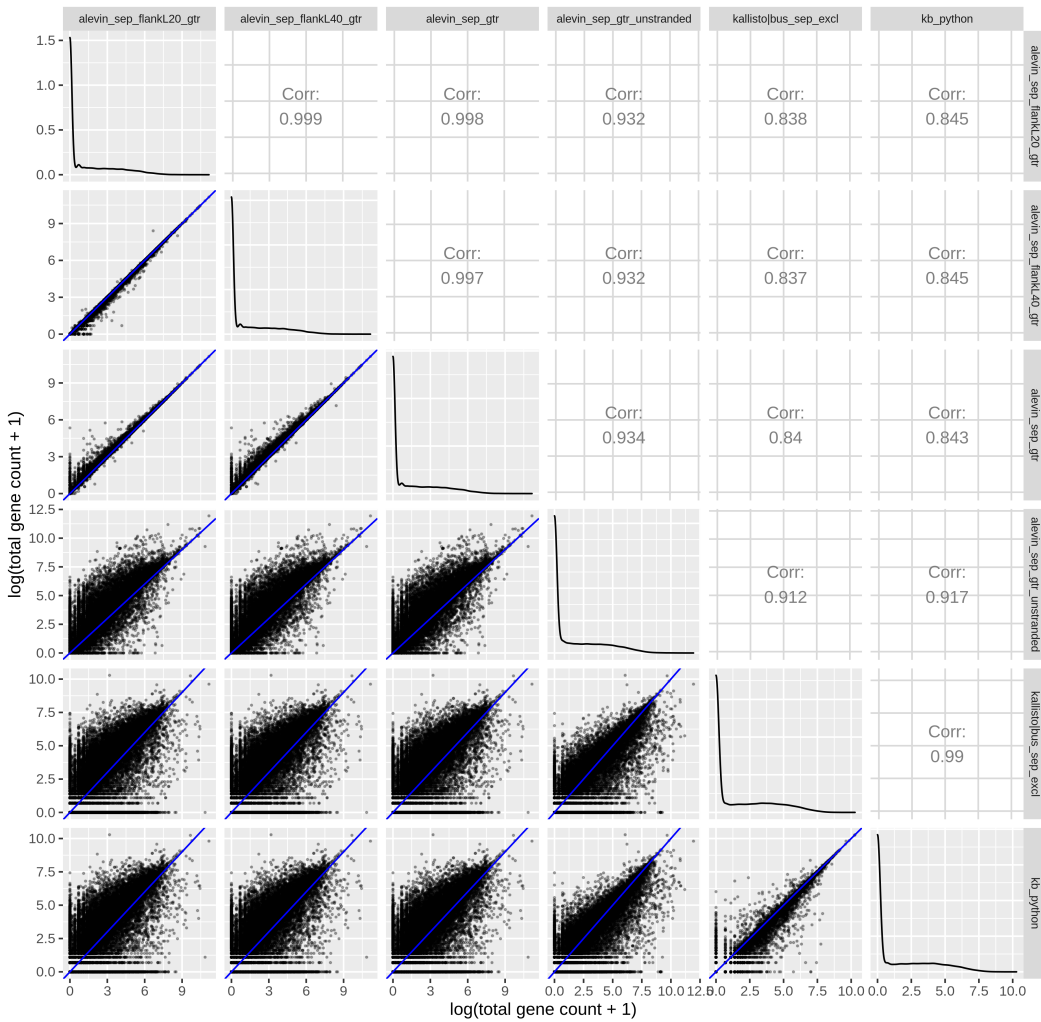

### Spermatogenesis, correlation, abundances and velocities, by gene and cell

Using genes selected by all methods

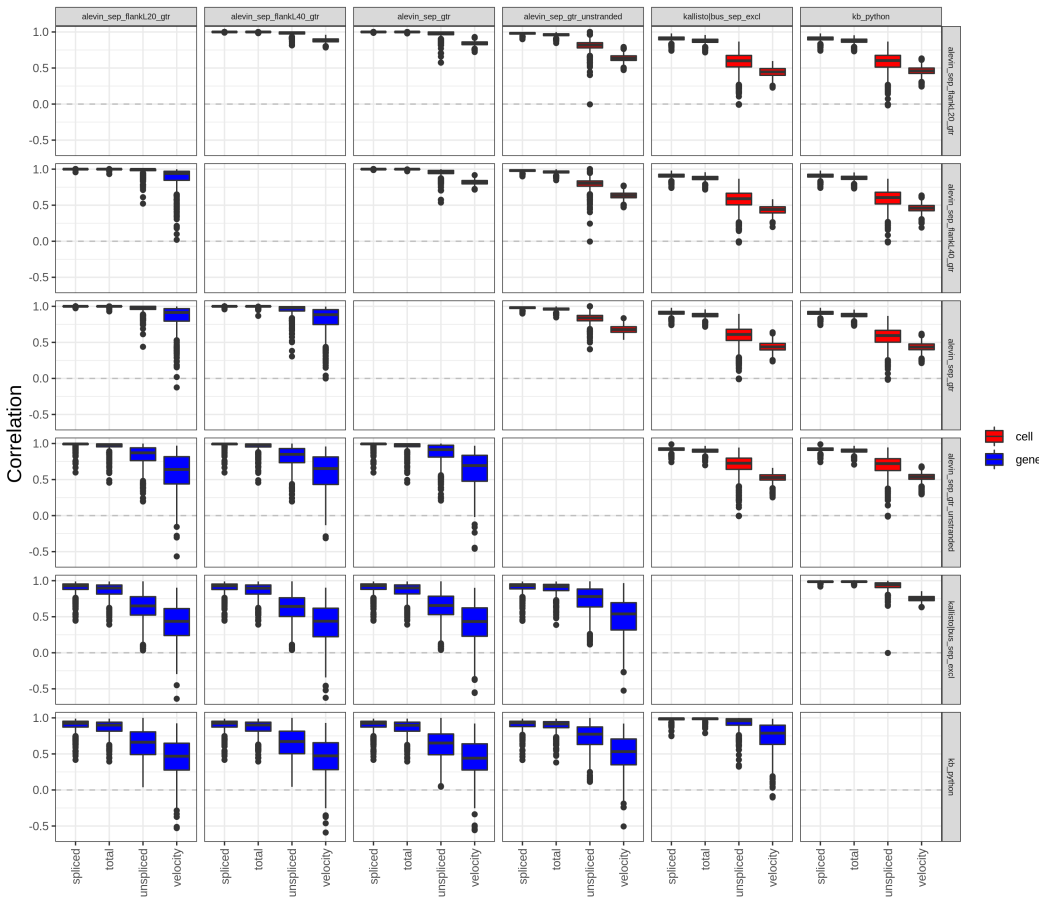

### Spermatogenesis, MDS, velocities, shared genes

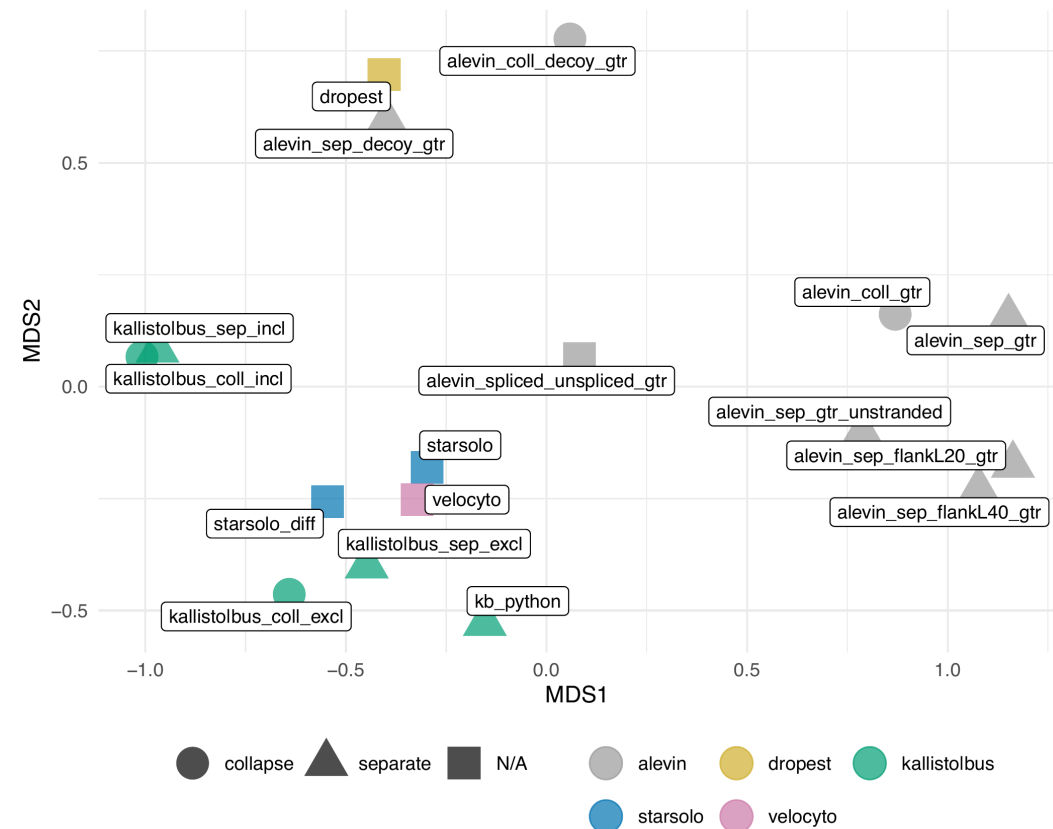

Supplement: pcbi.1008585.s003.pdf [file pcbi.1008585.s003.pdf]
