# Supplementary material for: Preprocessing choices affect RNA velocity results for droplet scRNA-seq data
Source: PubMed Central journal article supplement (PMC7822509; doi:10.1371/journal.pcbi.1008585), 2021-01-11

Pancreas, differences in total gene count across cells

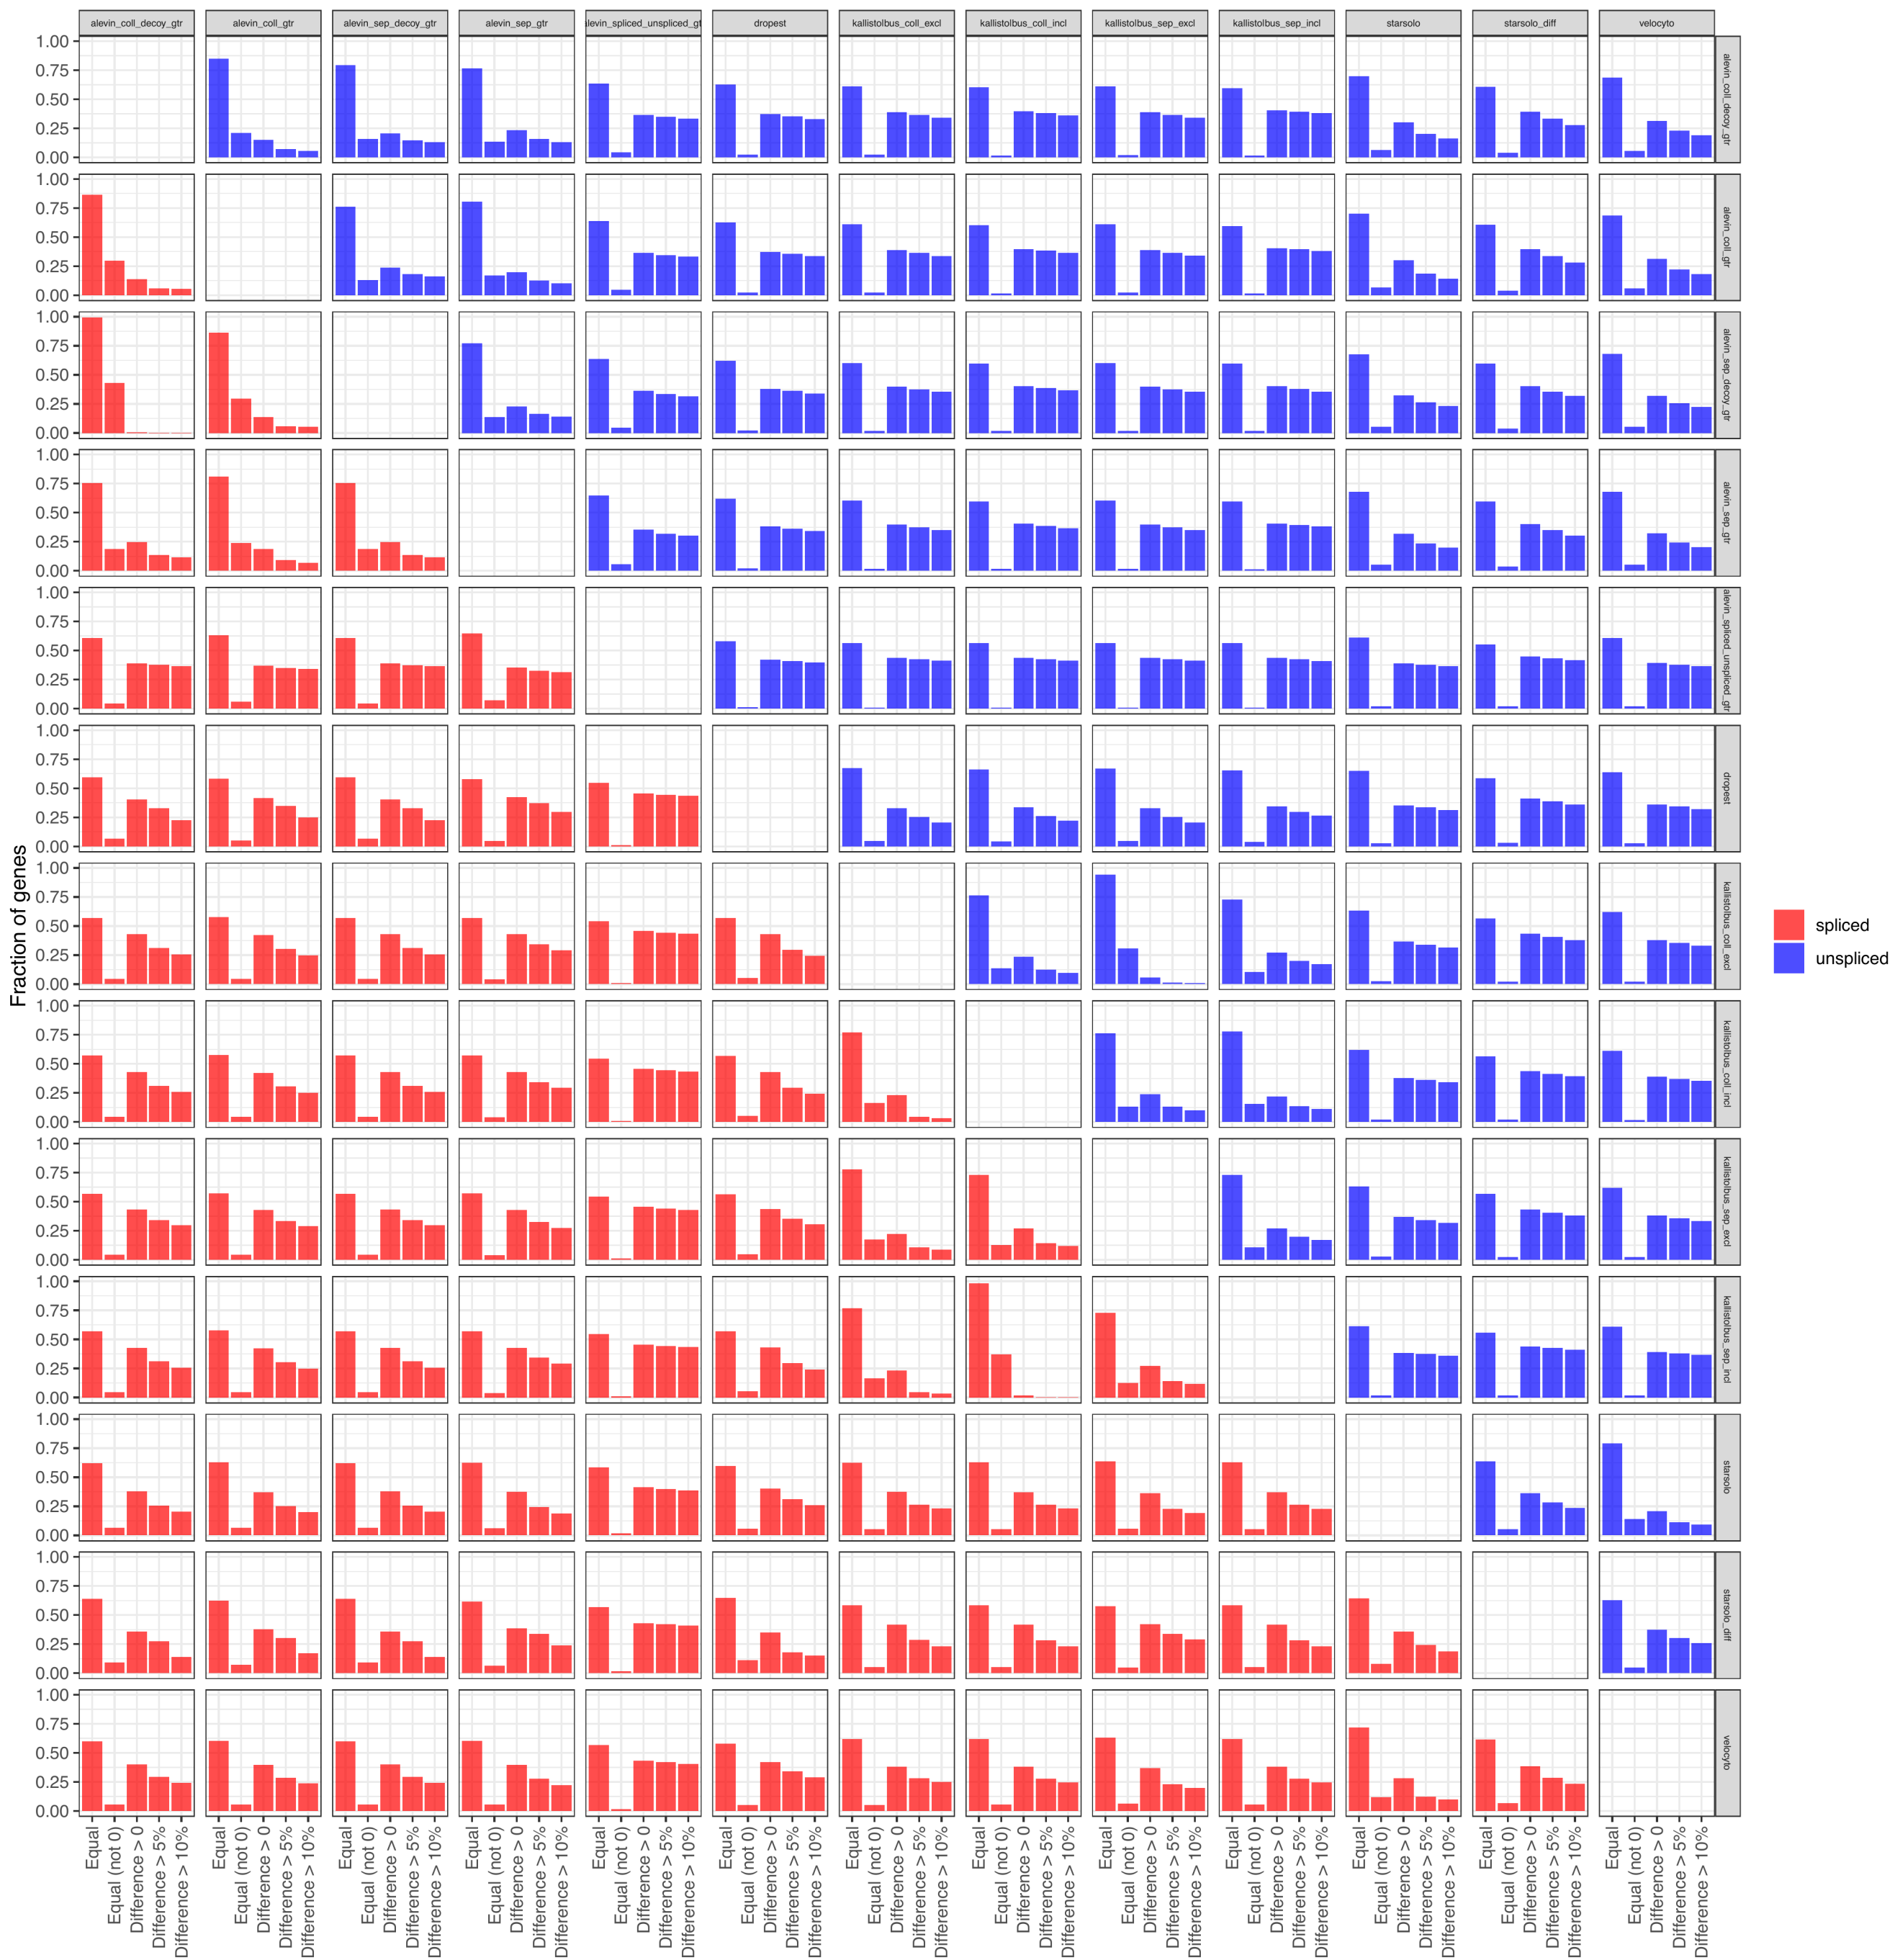

Supplement: pcbi.1008585.s005.pdf [file pcbi.1008585.s005.pdf]
