# Supplementary material for: Preprocessing choices affect RNA velocity results for droplet scRNA-seq data
Source: PubMed Central journal article supplement (PMC7822509; doi:10.1371/journal.pcbi.1008585), 2021-01-11

# Pancreas, fit likelihood vs average total abundance

For genes selected by all methods

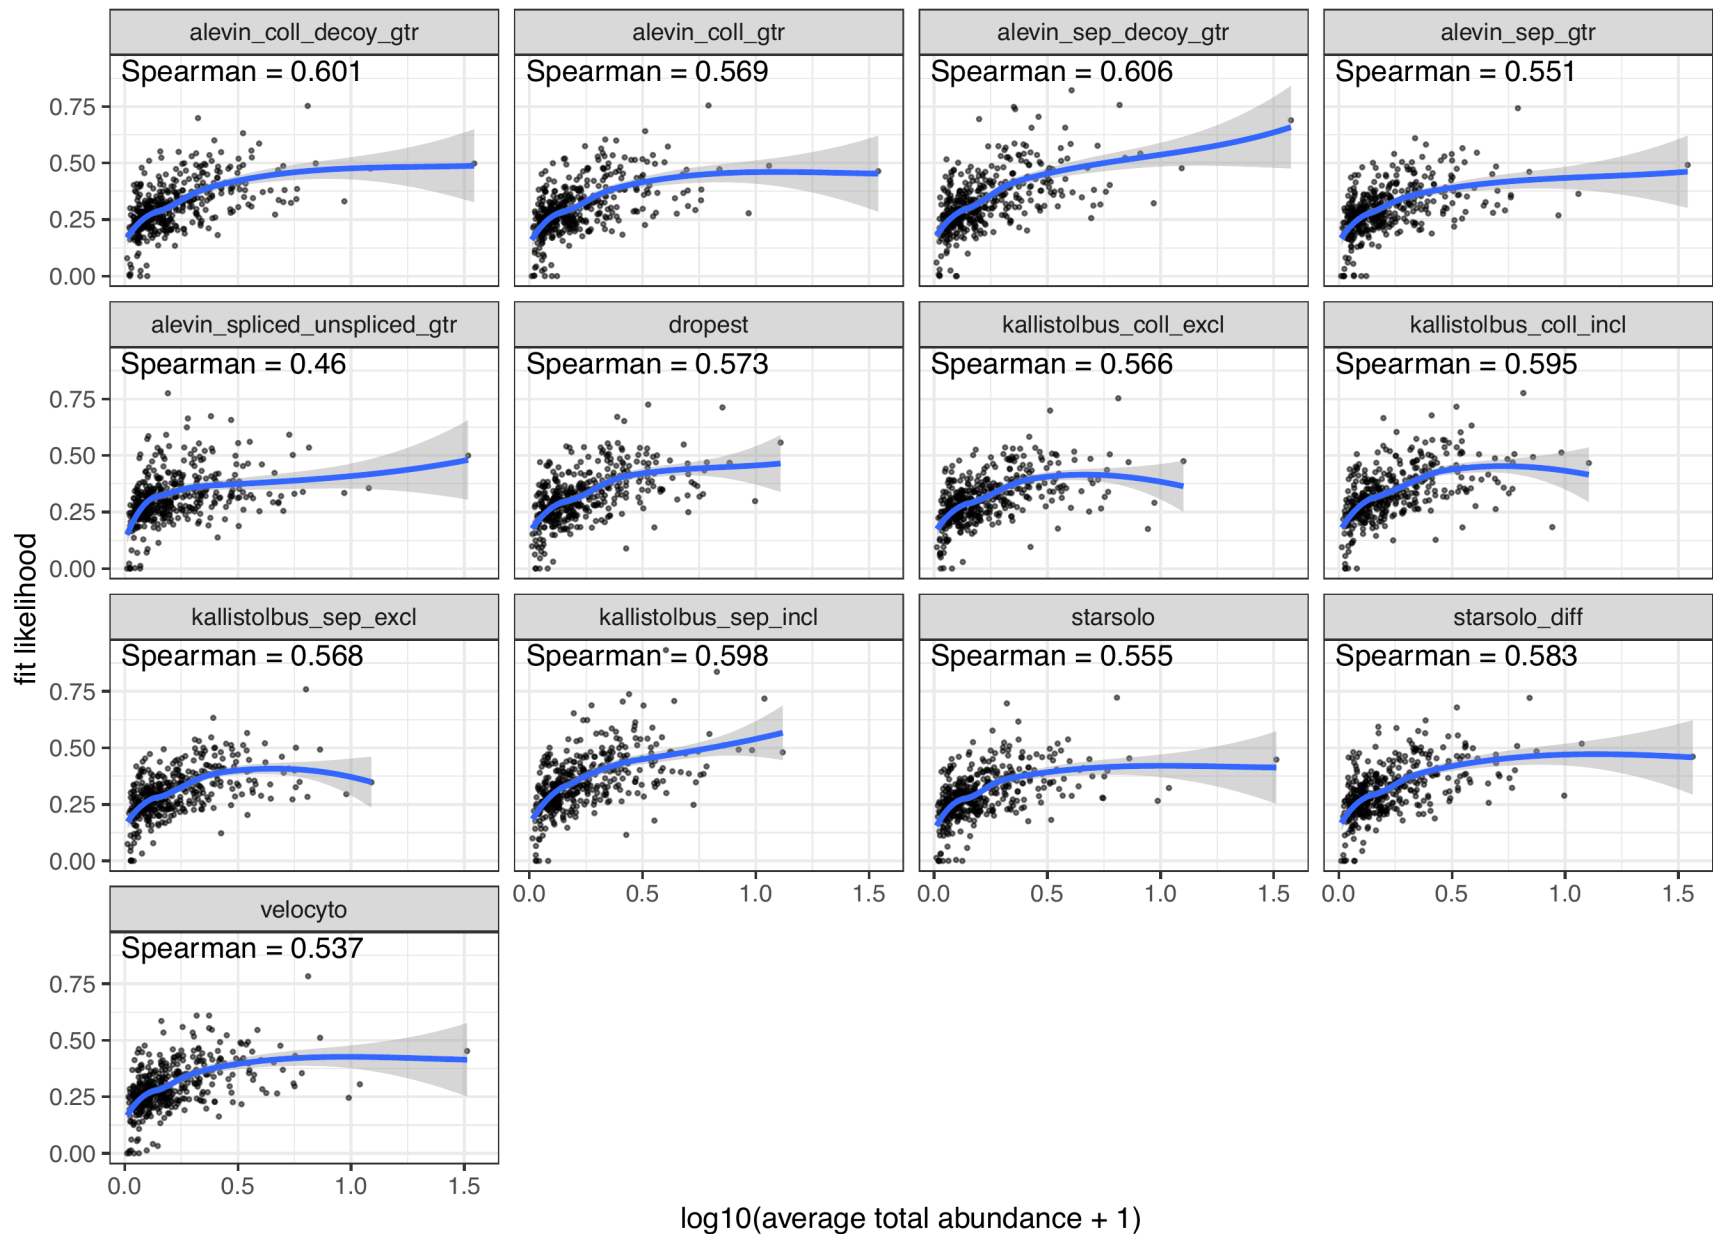

Supplement: pcbi.1008585.s012.pdf [file pcbi.1008585.s012.pdf]
