# Supplementary material for: Preprocessing choices affect RNA velocity results for droplet scRNA-seq data
Source: PubMed Central journal article supplement (PMC7822509; doi:10.1371/journal.pcbi.1008585), 2021-01-11

alevin\_coll\_decoy\_gtr

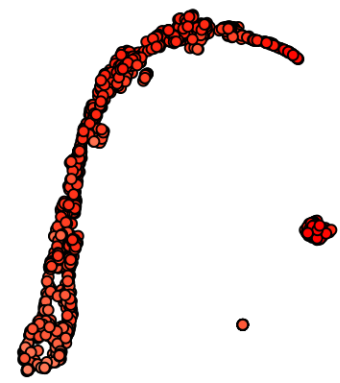

alevin\_coll\_gtr

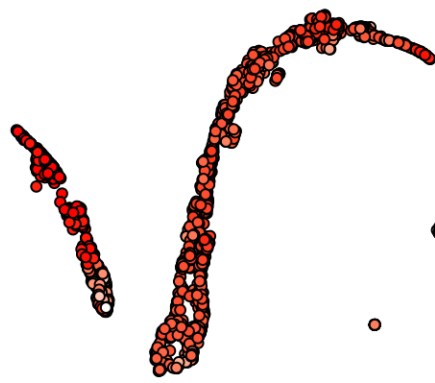

alevin\_sep\_decoy\_gtr

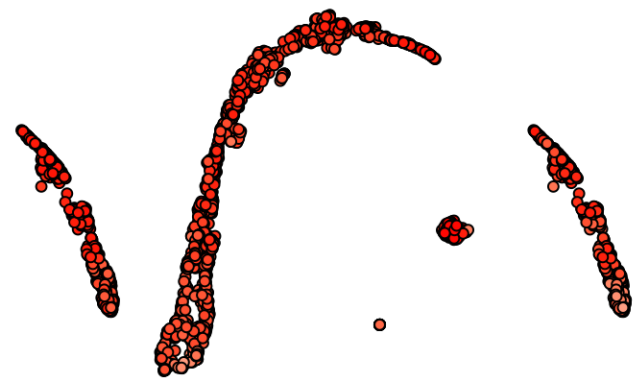

alevin\_sep\_gtr

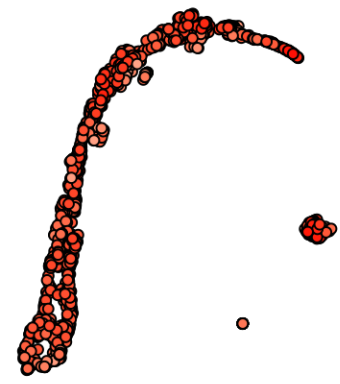

alevin\_spliced\_unspliced\_gtr

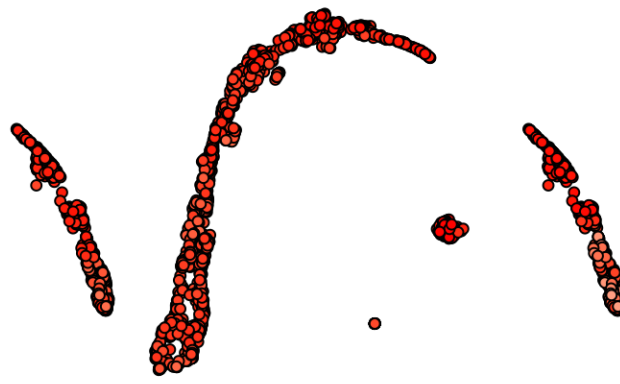

dropest

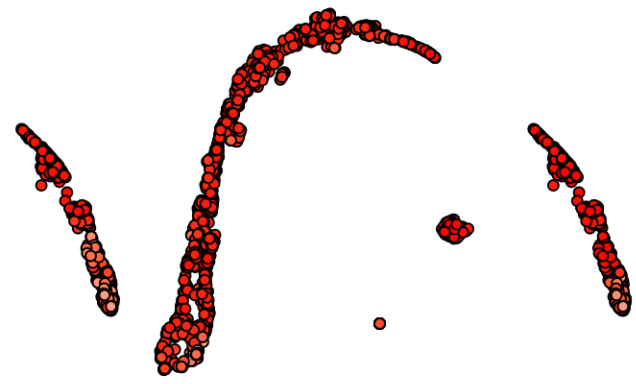

kallisto|bus\_coll\_excl

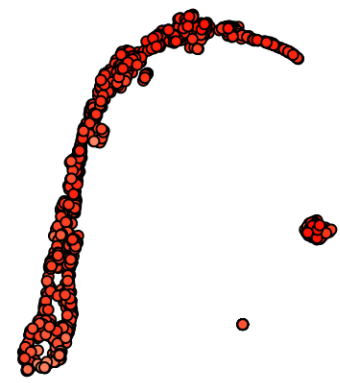

kallisto|bus\_coll\_incl

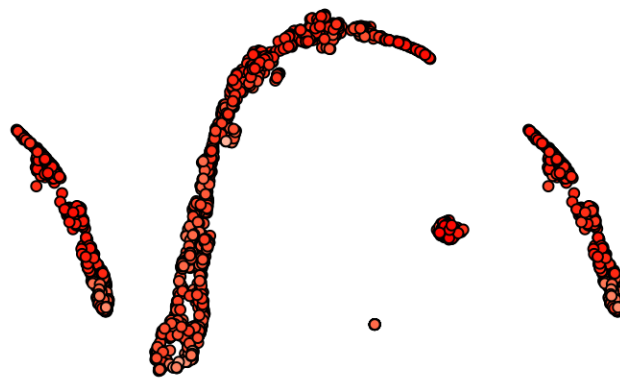

kallisto|bus\_sep\_excl

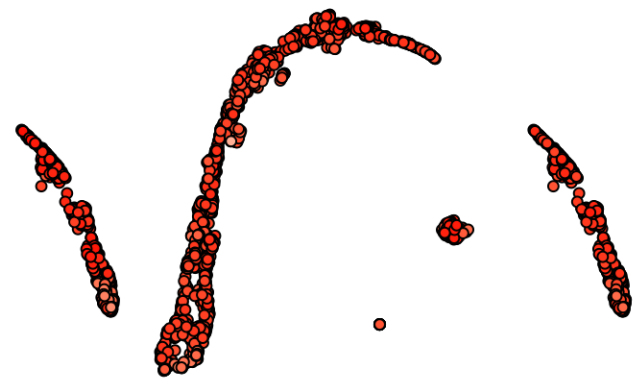

kallisto|bus\_sep\_incl

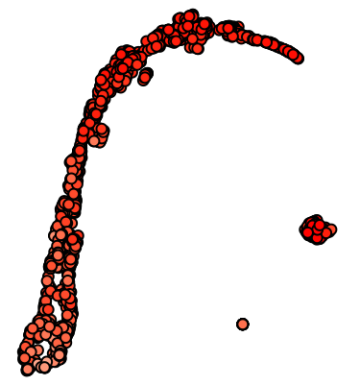

starsolo

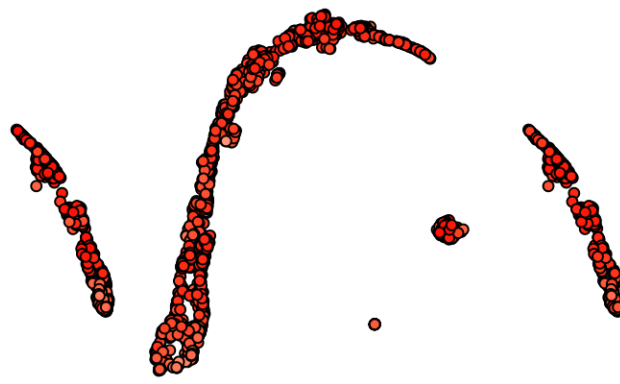

starsolo\_diff

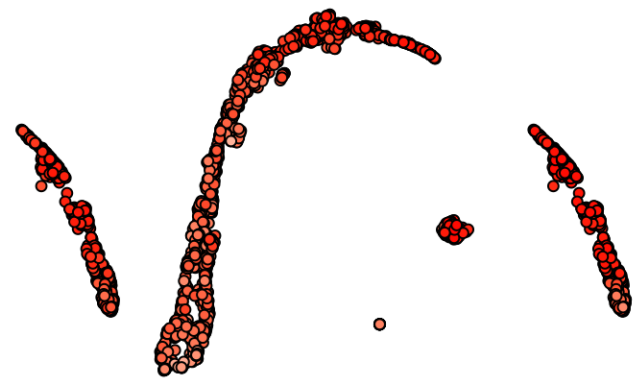

velocity

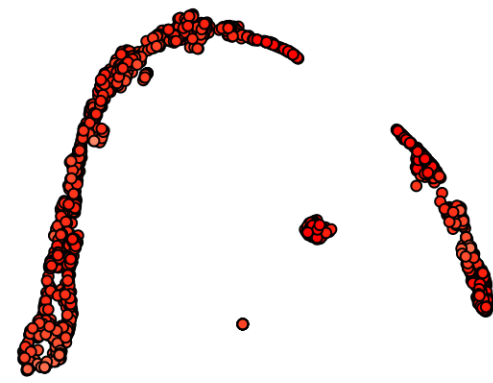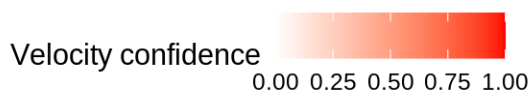

Supplement: pcbi.1008585.s020.pdf [file pcbi.1008585.s020.pdf]
