# Supplementary material for: Preprocessing choices affect RNA velocity results for droplet scRNA-seq data
Source: PubMed Central journal article supplement (PMC7822509; doi:10.1371/journal.pcbi.1008585), 2021-01-11

alevin\_coll\_decoy\_gtr

alevin\_coll\_gtr

alevin\_sep\_decoy\_gtr

alevin\_sep\_gtr

alevin\_spliced\_unspliced\_gtr

kallisto|bus\_coll\_excl

kallisto|bus\_coll\_incl

kallisto|bus\_sep\_excl

kallisto|bus\_sep\_incl

starsolo

starsolo\_diff

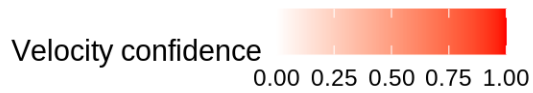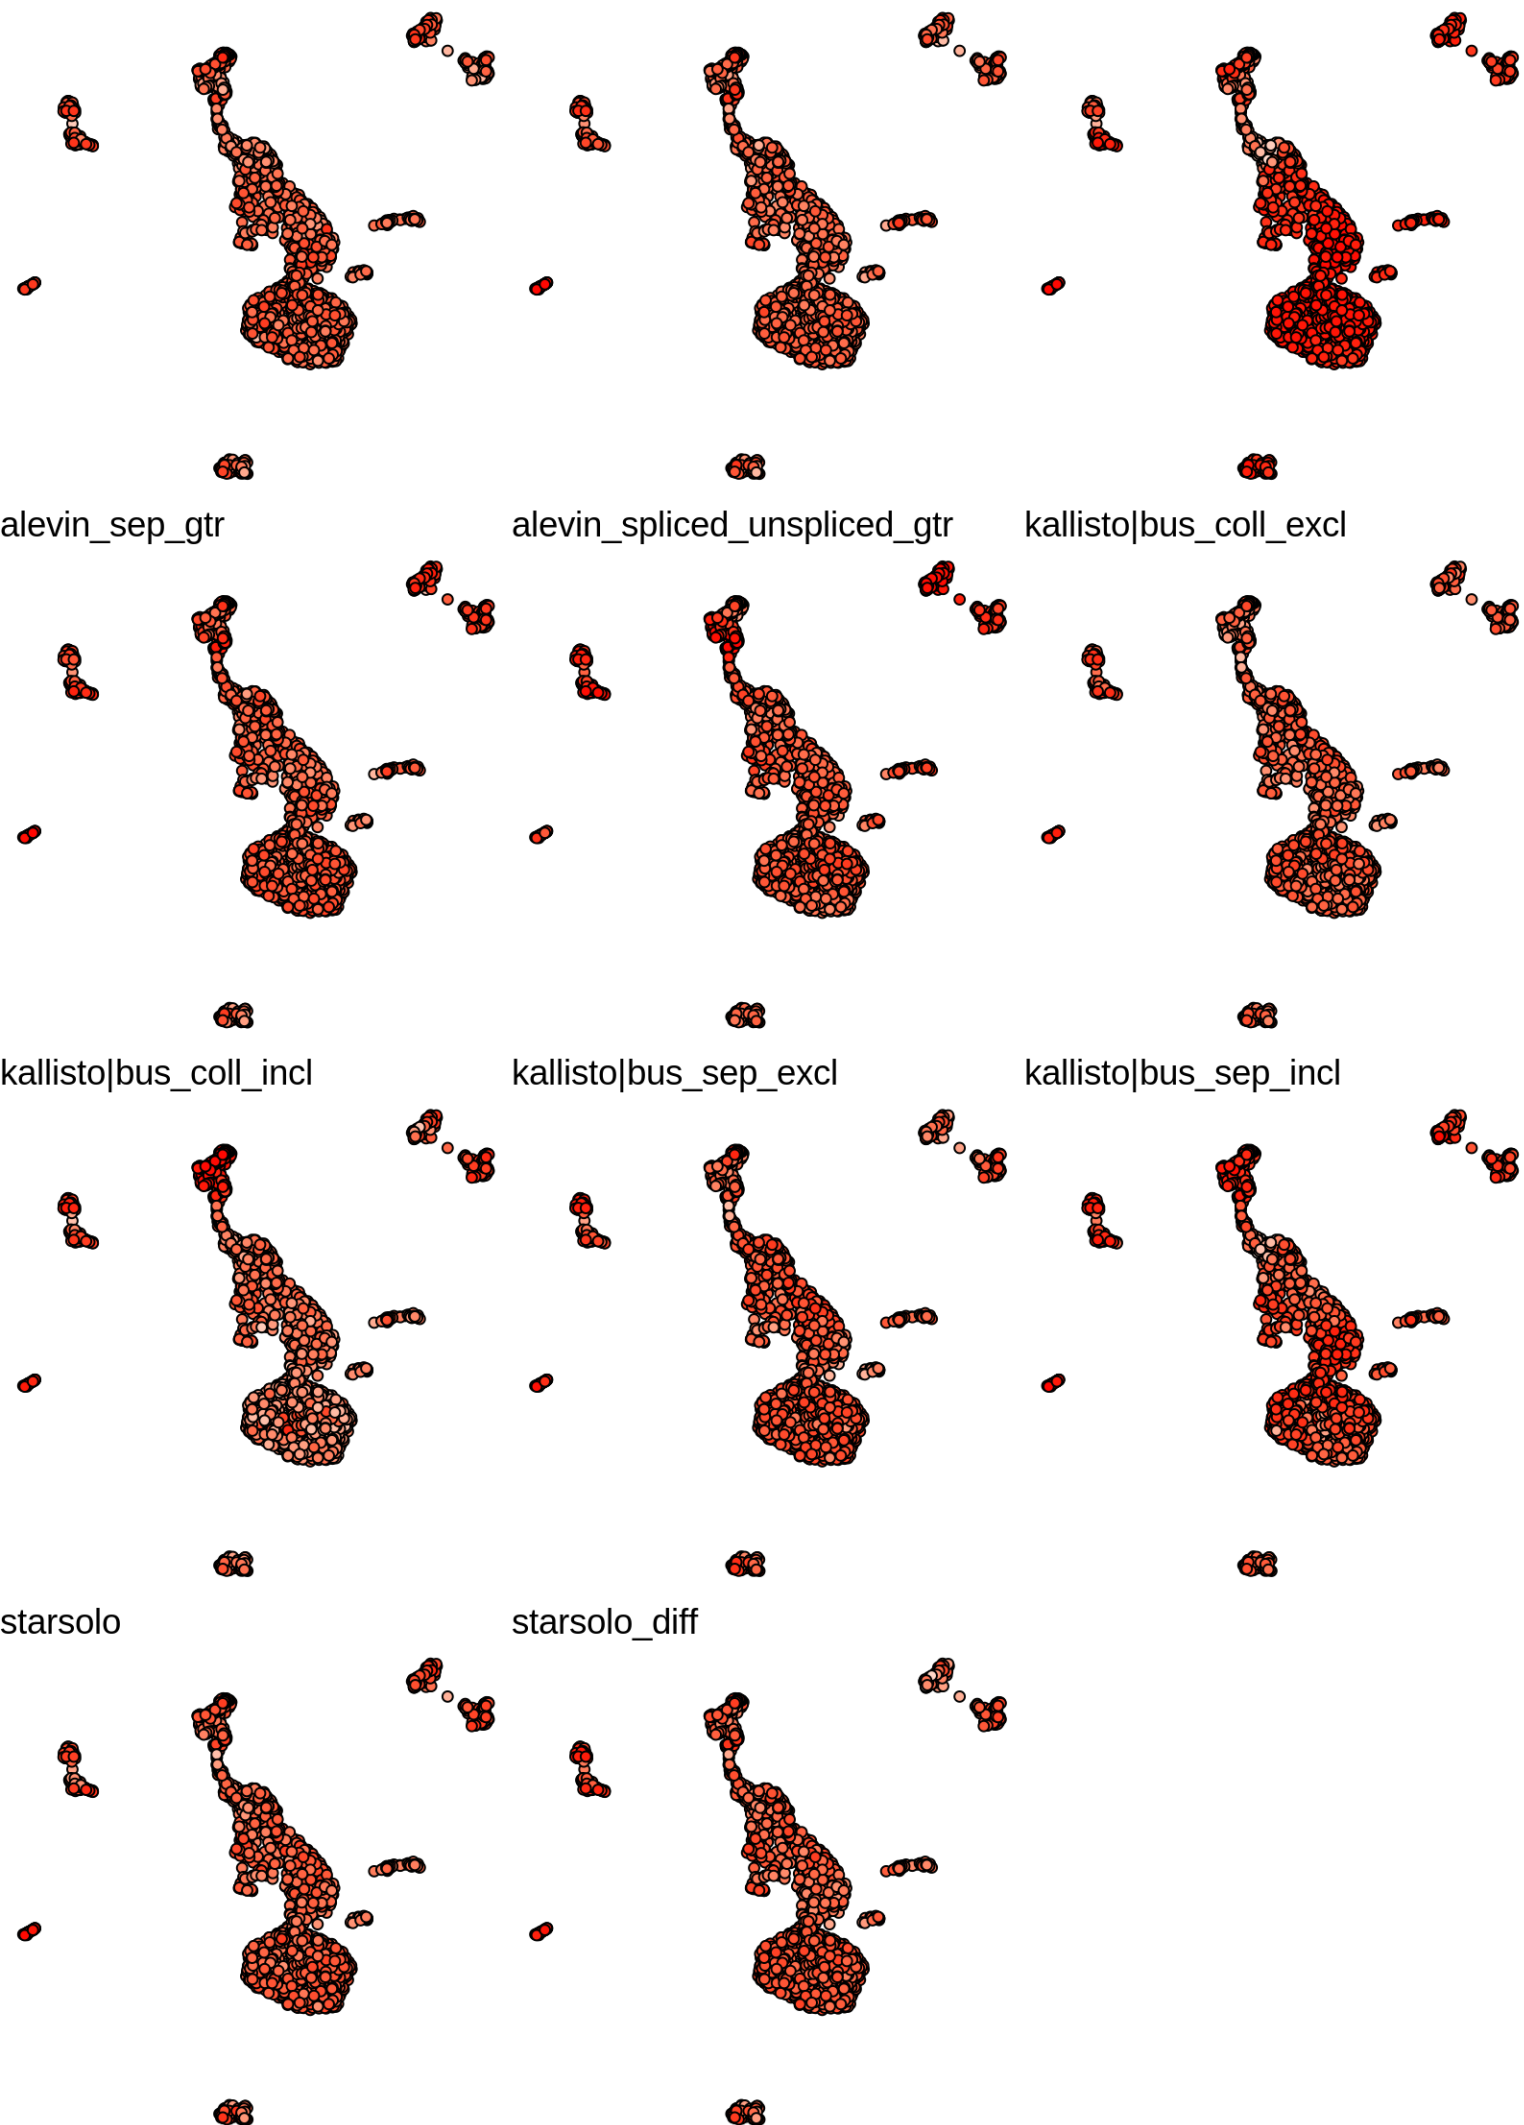

Supplement: pcbi.1008585.s021.pdf [file pcbi.1008585.s021.pdf]
