# Supplementary material for: Preprocessing choices affect RNA velocity results for droplet scRNA-seq data
Source: PLoS Comput Biol. 2021 Jan 11;17(1):e1008585. doi: 10.1371/journal.pcbi.1008585 (PMC7822509; doi:10.1371/journal.pcbi.1008585)

alevin\_coll\_decoy\_gtr

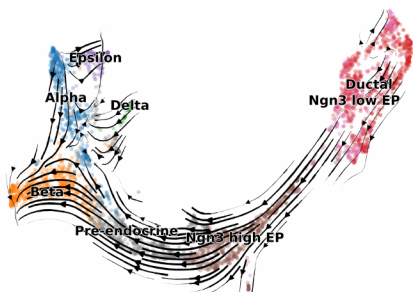

alevin\_coll\_gtr

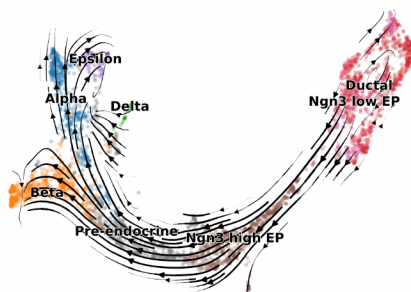

alevin\_sep\_decoy\_gtr

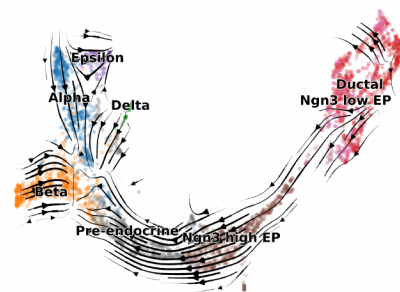

alevin\_sep\_gtr

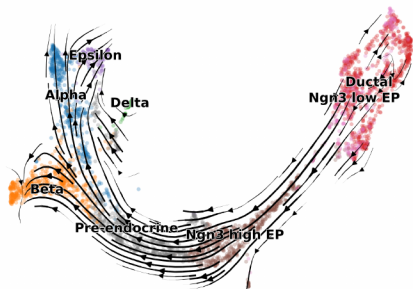

alevin\_spliced\_unspliced\_gtr

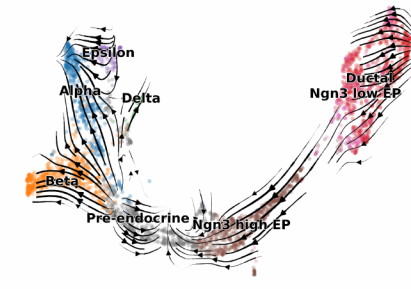

dropest

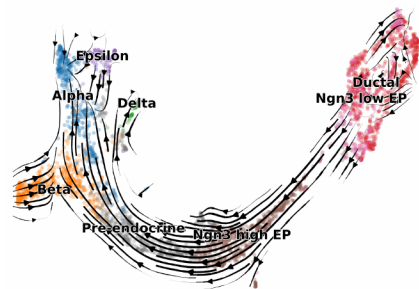

kallistolbus\_coll\_excl

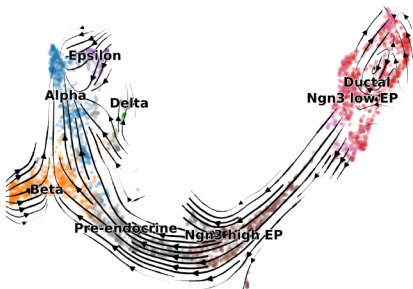

kallistolbus\_coll\_incl

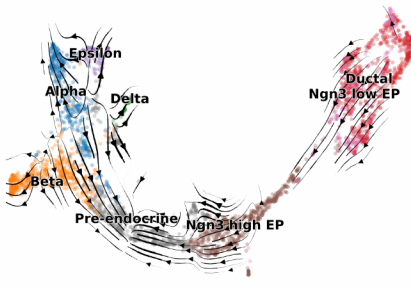

kallistolbus\_sep\_excl

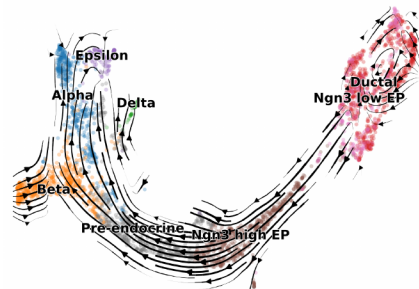

kallistolbus\_sep\_incl

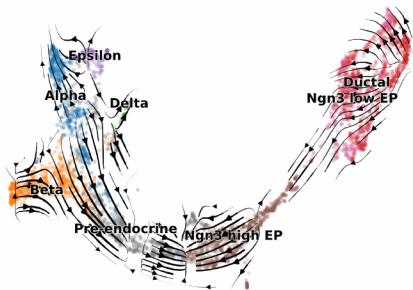

starsolo

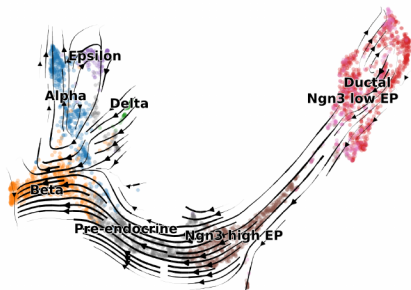

starsolo\_diff

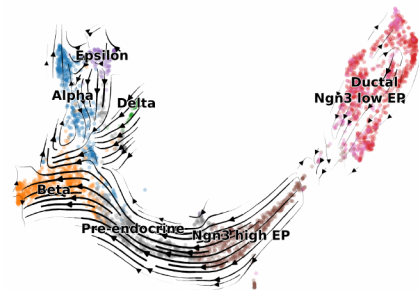

velocityto

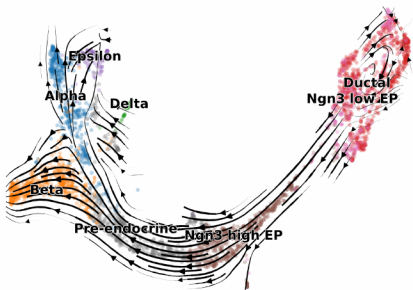

Supplement: S16 Fig — (PDF) [file pcbi.1008585.s016.pdf]
